# Supplementary material
Source: publisher figshare collection journal article supplement (https://karger.figshare.com/ndownloader/files/24757484)
Supplement: Supplementary file 1 [file 24757484]

**Supplemental Material 1**

**The Empirical Dietary Inflammatory Pattern score (EDIP) score calculation**

A modified-EDIP score was calculated with the formula: (165.03443 x processed meat servings/day) + (140.19344 x red meat servings/day) + (144.60554 x organ meat servings/day) + (252.44533 x other fish servings/day) + (81.21217 x refined grain servings/day) – (136.99127 x beer servings/day) – (249.70411 x wine servings/day) – (45.08391 x snack servings/day) – (1,175.21060 x pizza servings/day). All scores were divided by 1,000.1

1. Tabung FK, Smith-Warner SA, Chavarro JE, et al. Development and validation of an empirical dietary inflammatory index. *J. Nutr.* 2016;146(8):1560.

**Supplemental Table 1 Person and tumour-based incidence of SCC and BCC (N=260)**

| **SCC** |  |
| --- | --- |
| Persons affected by new SCC a | 100 (38%) |
| Person-based incidence per 1,000 person-years | 167 |
| Sum of tumours developed in follow-up period | 426 |
| Median tumours developed per person (min, max) | 0 (0, 40) |
| Tumour-based incidence per 1,000 person-years | 533 |
| **BCC** |  |
| Persons affected by new BCC a | 93 (36%) |
| Person-based incidence per 1,000 person-years | 145 |
| Sum of tumours developed in follow-up period | 343 |
| Median tumours developed per person (min, max) | 0 (0, 22) |
| Tumour-based incidence per 1,000 person-years | 429 |

BCC: basal cell carcinoma; SCC: squamous cell carcinoma

a Number of patients who developed at least one keratinocyte cancer in the follow-up period

Supplemental Table 2 Modified Empirical Dietary Inflammatory Pattern Score and risk of person-based SCC and BCC in renal transplant recipients (N=260)

|  | **Relative Risk (95% CI)** | |
| --- | --- | --- |
| **Modified-EDIP** | **SCC** | **BCC** |
|  |  | |
| **Base Model a** |  |  |
| Low (n=78) | 1.00 (reference) | 1.00 (reference) |
| Intermediate (n=78) | 1.24 (0.72–2.13) | 1.58(0.93–2.66) |
| High (n=104) | 1.34 (0.80–2.27) | 1.38 (0.82–2.31) |
|  |  |  |
| **Final Model b** |  |  |
| Low (n=78) | 1.00 (reference) | 1.00 (reference) |
| Intermediate (n=78) | 1.26 (0.72–2.20) | 1.44 (0.84–2.46) |
| High (n=104) | 1.21 (0.69–2.12) | 1.27 (0.77–2.08) |
|  |  |  |

BCC: basal cell carcinoma; EDIP: empirical dietary inflammatory pattern, RR: relative risk, SCC: squamous cell carcinoma

a Base model: adjusted for age and sex for all tumour types and transplant types

b Final model for BCC: age, sex, skin cancer excision history. Final model for SCC: age, sex, education, skin cancer excision history.
